# Supplementary material for: Phenolic Acids Rescue Iron-Induced Damage in Murine Pancreatic Cells and Tissues
Source: MDPI journal article supplement (doi:10.3390/molecules28104084), 2023-05-14
Supplement: s1 [file s1]

### Supplementary Figure

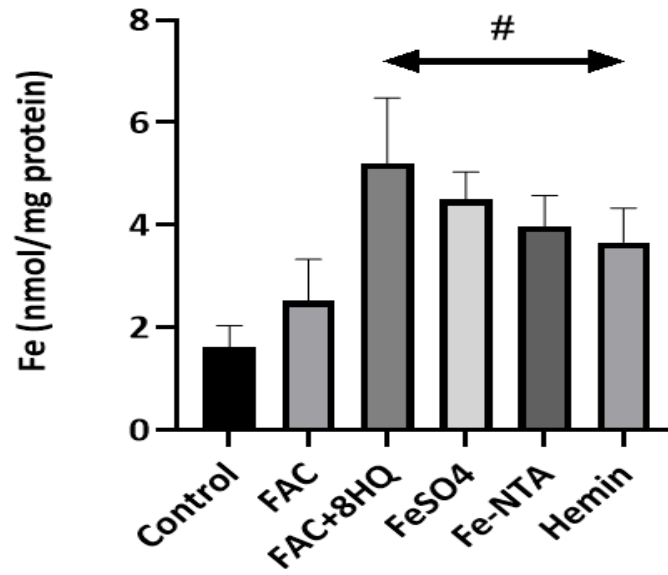

Figure S1: Iron accumulation in MIN6 cells treated with the different iron sources. Pancreatic MIN6  $\beta$  cells were treated with 50  $\mu\text{mol/L}$  FAC, 50  $\mu\text{mol/L}$  FAC and 20  $\mu\text{mol/L}$  8HQ (FAC+8HQ), 50  $\mu\text{mol/L}$   $\text{FeSO}_4$ , Fe-NTA and hemin for 2 h. Then, cellular iron concentrations were measured by inductively coupled plasma mass spectrometry (ICP-OES). #  $p < 0.05$  control vs. treatment groups. One-way ANOVA, Tukey post-hoc test.
